# Supplementary material for: Single-cell atlas of the aging mouse colon
Source: PubMed Central journal article supplement — iScience. 2022 Apr 4;25(5):104202. doi: 10.1016/j.isci.2022.104202 (PMC9035718; doi:10.1016/j.isci.2022.104202), 2022-04-04
Supplement: mmc1.pdf [file mmc1.pdf]

**iScience, Volume 25**

**Supplemental information**

**Single-cell atlas**

**of the aging mouse colon**

**Dovydas Širvinskas, Omid Omrani, Jing Lu, Mahdi Rasa, Anna Krepelova, Lisa Adam, Sandra Kaeppel, Felix Sommer, and Francesco Neri**

[Supplementary Information](#)

Supplementary material contains 5 Supplementary Figures

[Supplementary Figures:](#)

**A**

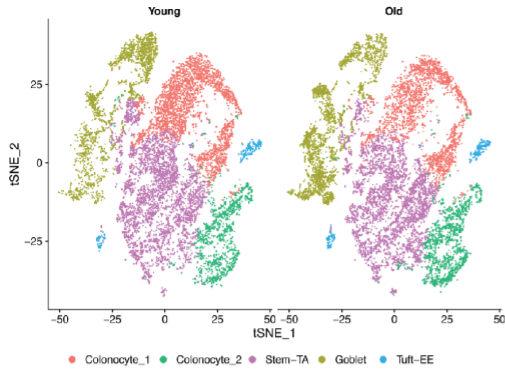

**B**

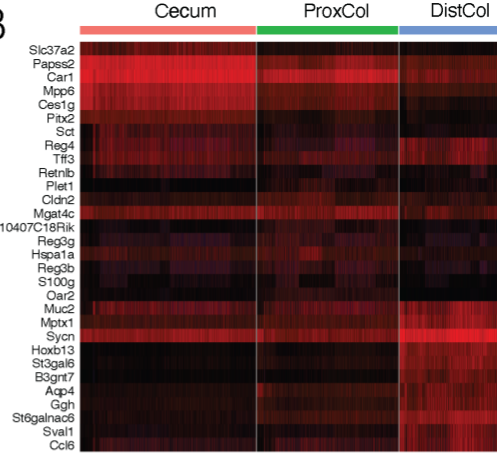

**C**

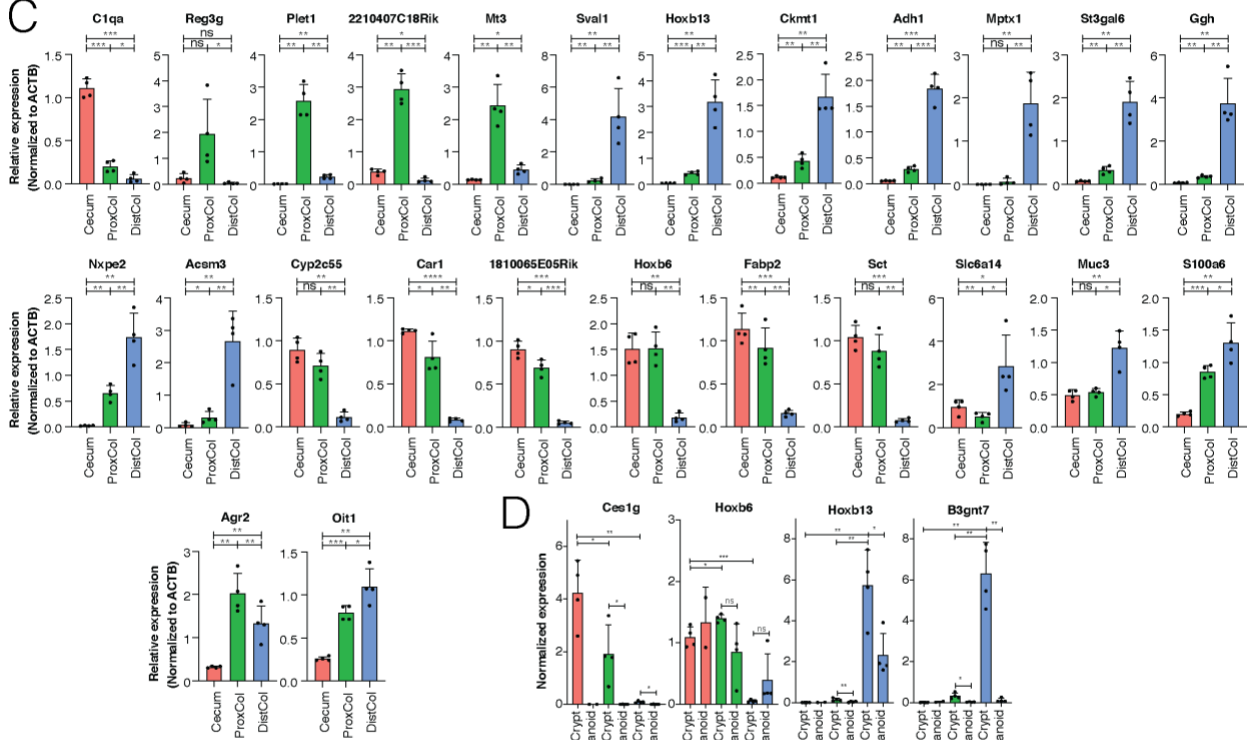

**D**

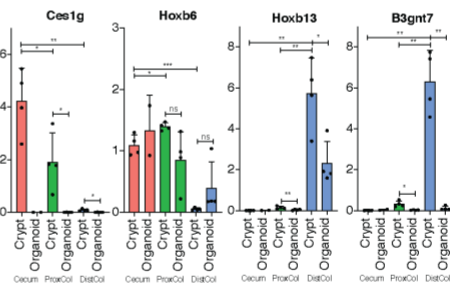

**E**

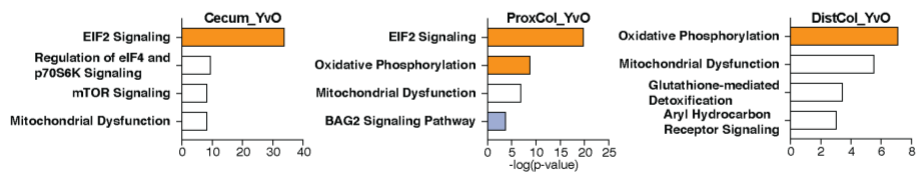

**F**

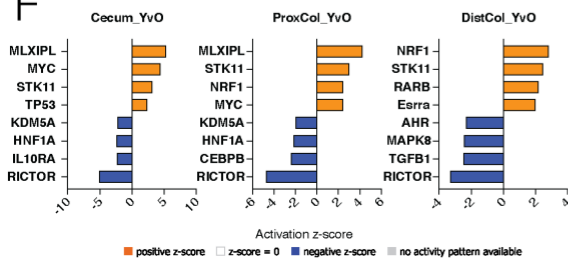

**G**

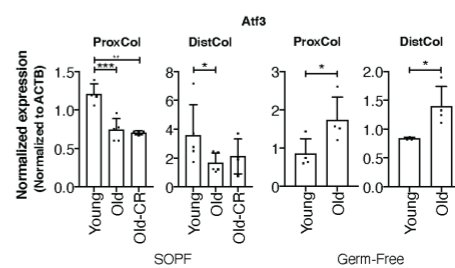

**Figure S1. Compartment differences of young colonic epithelium, related to Fig.1.**

**(A)** Separated tSNE plots of young and old mice (n = 5 young, 6 old biologically independent animals) **(B)** Top 10 marker gene heatmap for large intestinal compartments. **(C)** qPCR performed on crypts isolated from different compartments of young female mice (n = 4 biologically independent animals; 1-tailed paired *t*-test; mean + SD). **(D)** qPCR performed on crypt and organoid pairs from different compartments of young male mice. (n = 4 biologically independent animals (n = 2 cecum organoid samples); 1-tailed paired *t*-test used between young compartments, 1-tailed unpaired *t*-test used between young and old animals; mean + SD). **(E)** Enriched Canonical Pathways from IPA for compartments. (n = 5 young, 6 old biologically independent animals) **(F)** Predicted Upstream Regulators from IPA for compartments. (n = 5 young, 6 old biologically independent animals) **(G)** qPCR performed on crypts isolated from different compartments of young, old and old calorie restricted specific pathogen free female mice as well as young and old germ-free female mice. (SOPF: n = 5 young, 5 old and 4 old calorie restricted biologically independent animals (Young ProxCol n = 4); Germ-Free: n = 4 young, 4 old biologically independent animals; 1-tailed unpaired *t*-test; mean + SD). ns,  $p \geq 0.05$ ; \*,  $p < 0.05$ ; \*\*,  $p < 0.01$ ; \*\*\*,  $p < 0.001$ ;

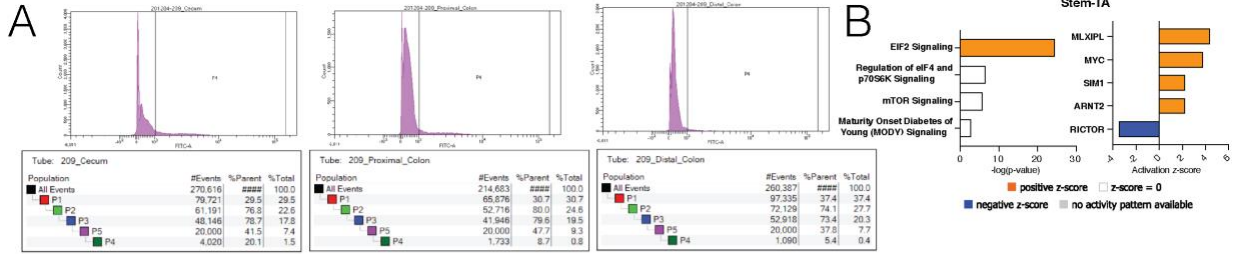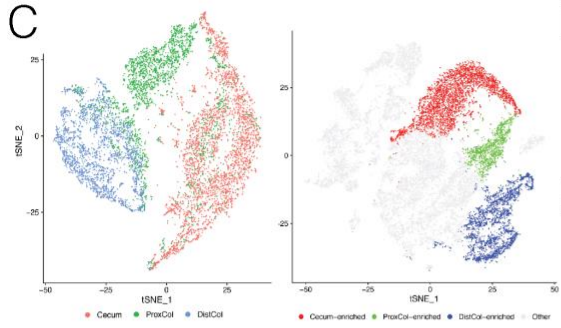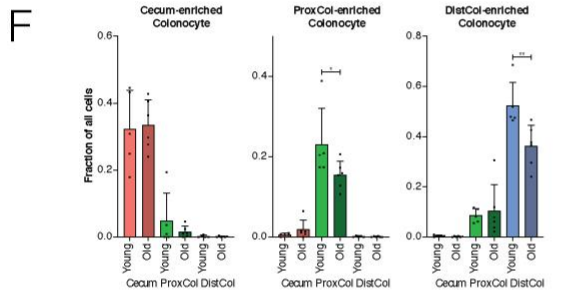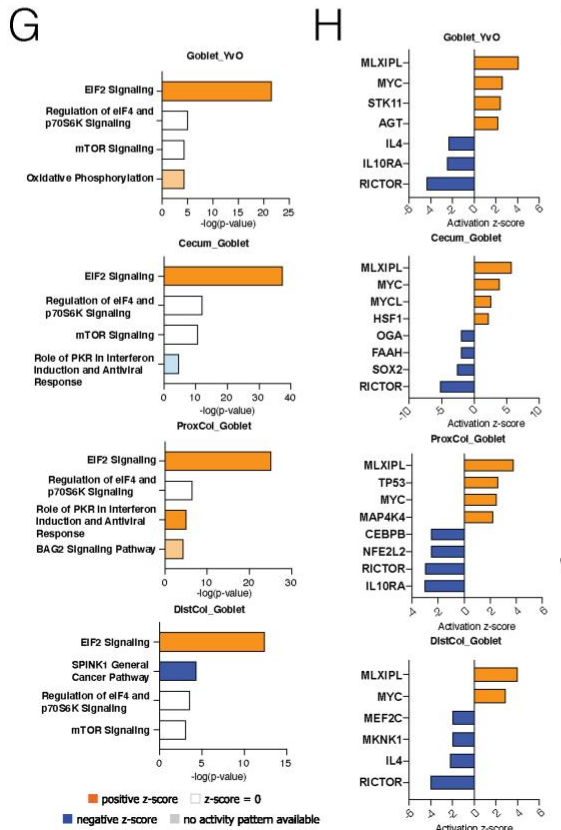

**Figure S2. Differences between compartments and during aging in different epithelial cell types, related to Fig.2, Fig.3 and Fig.4.**

**(A)** FACS gating of Lgr5-GFP cells. **(B)** Enriched Canonical Pathways and Predicted Upstream regulators from IPA for the Stem-TA cluster. (n = 5 young, 6 old biologically independent animals) **(C)** Separate tSNE of colonocytes\_1 and \_2 with compartments overlaid (left) and Graph-based re-clustered colonocytes overlaid on the original tSNE (right). (n = 5 young, 6 old biologically independent animals) **(D)** Fractions of compartment-enriched colonocytes in the corresponding compartments (n = 5 young, 6 old biologically independent animals). **(E)** Top 10 marker gene heatmap for re-clustered colonocytes (n = 5 young, 6 old biologically independent animals). **(F)** Bar charts of re-clustered colonocyte fractions in different compartments in young and old. (n = 5 young, 6 old biologically independent animals; 1-tailed unpaired *t*-test; mean + SD). **(G)** Enriched Canonical Pathways from IPA for goblet cells (n = 5 young, 6 old biologically independent animals). **(H)** Predicted Upstream Regulators from IPA for goblet cells. (n = 5 young, 6 old biologically independent animals) **(I)** Top 10 marker gene heatmap for tuft cells in different compartments (n = 5 young, 6 old biologically independent animals). **(J)** Enriched Canonical Pathways from IPA for Tuft-EE cells. (n = 5 young, 6 old biologically independent animals) **(K)** Predicted Upstream Regulators from IPA for Tuft-EE cells. (n = 5 young, 6 old biologically independent animals) ns,  $p \geq 0.05$ ; \*,  $p < 0.05$ ; \*\*,  $p < 0.01$ ; \*\*\*,  $p < 0.001$ ;

**A**

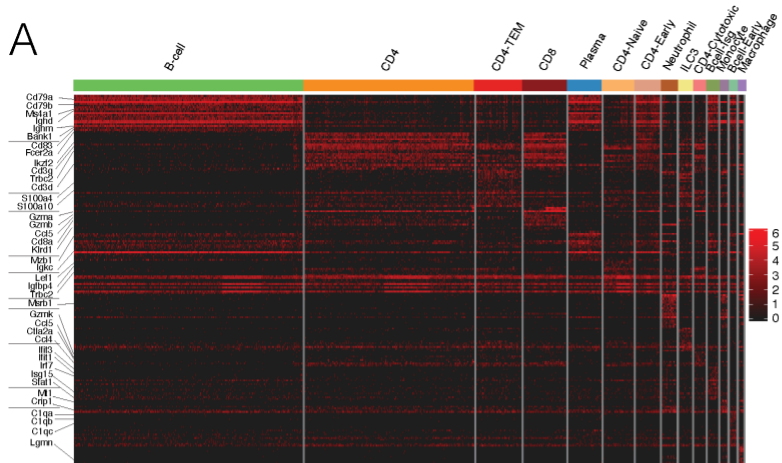

**B**

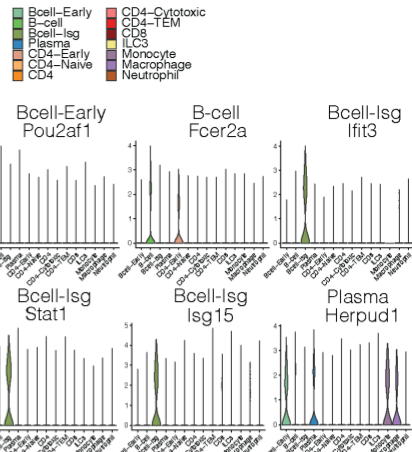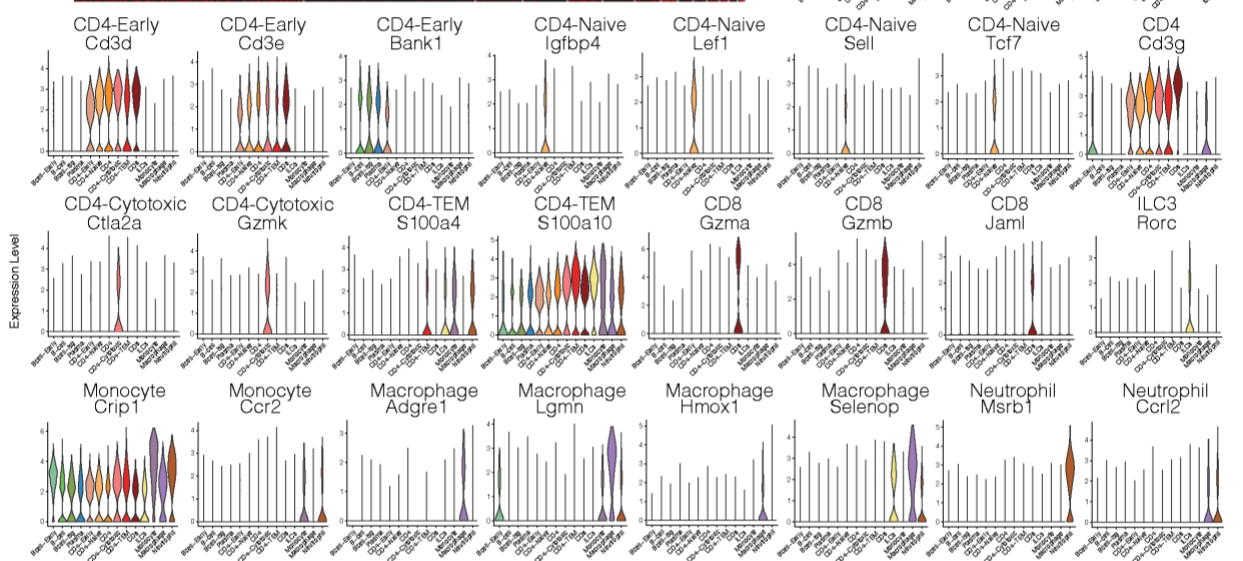

**C**

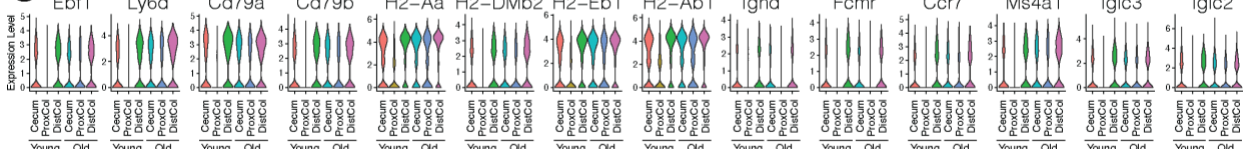

**D**

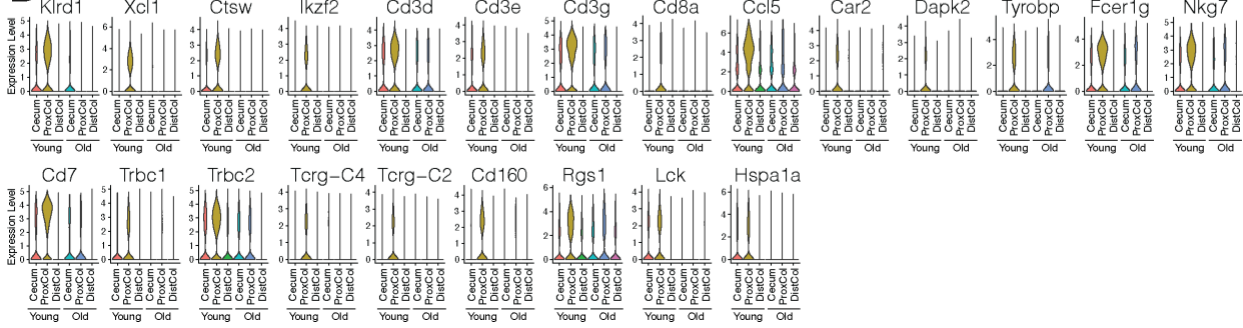

**Figure S3. Immune cell population enrichment in different compartments of young mouse colon. Related to Fig.5.**

**(A)** Hierarchical clustering and heatmap of the expression of the top 20 markers of each of the 14 clusters in immune scRNAseq analysis (n = 4 young, 4 old biologically independent animals). **(B)** Violin plot of the expression level of typical marker genes in the same dataset as in (A) (n = 4 young, 4 old biologically independent animals). **(C)** Violin plots of the expression levels of marker genes for B-, CD4 and CD8 cells in different compartments in the large intestine of young and old mice. (n = 4 young, 4 old biologically independent animals).



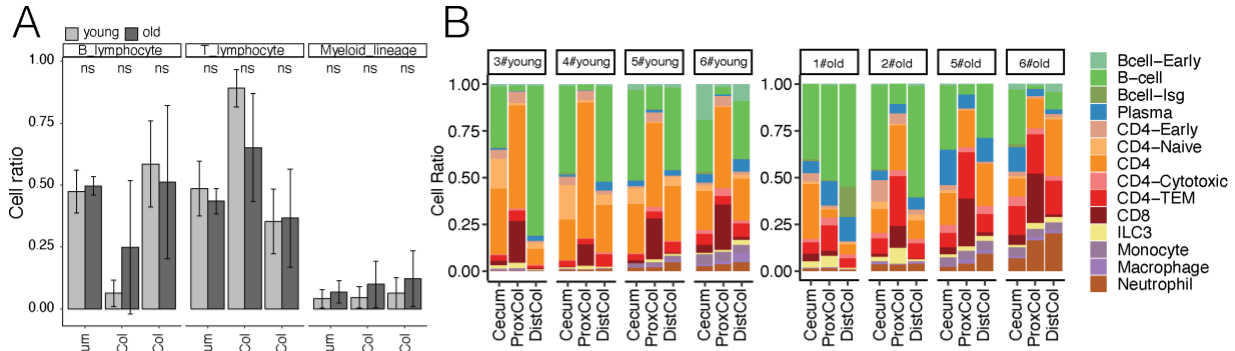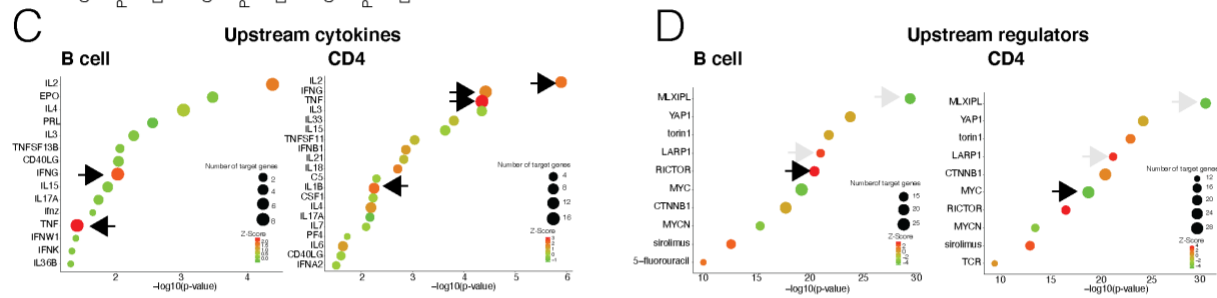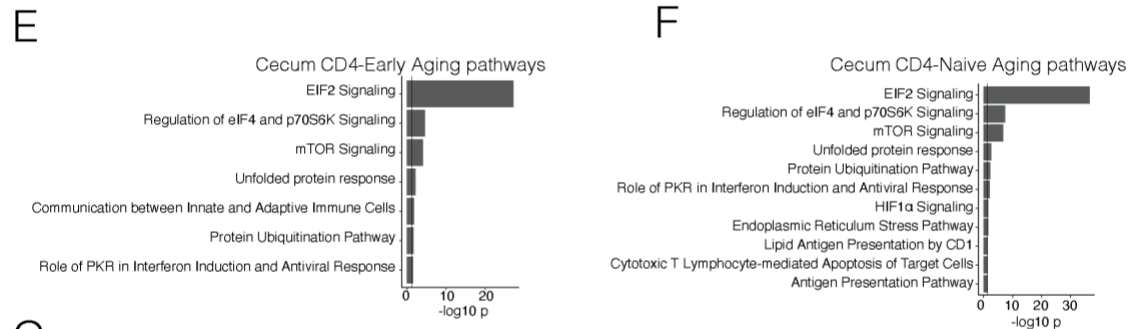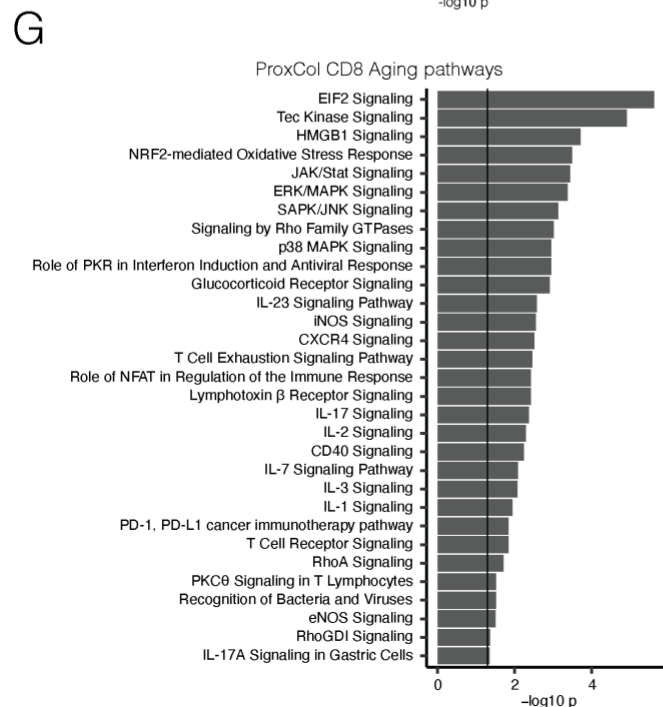

**Figure S4. Different aging characteristics of immune cells from different compartments of large intestine, related to Fig.6.**

**(A)** Bar charts of cell ratio of the three immune lineages between young and old mice in cecum, proximal colon and distal colon. (n = 4 young, 4 old biologically independent animals; Welch's two-tailed *t*-test; mean  $\pm$  SD). **(B)** Stacked bar charts showing the cell population composition in each compartment of each sample (n = 4 young, 4 old biologically independent animals). **(C, D)** Bubble plots showing typical upstream cytokines **(C)** and upstream regulators **(D)** potentially inducing the aging changes in B- and CD4 cells of large intestine. P value was calculated by using Fisher's Exact Test, z-score was calculated here to show the activated prediction (z>0) or inhibited prediction (z<0) (n = 4 young, 4 old biologically independent animals). **(E, F, G)** Bar chart showing the -log<sub>10</sub> enrichment p-value (x-axis) of the GO pathways enriched in cecum B cell aging **(E)**, cecum CD4-Naïve cell aging **(F)** and ProxCol CD8 aging **(G)**. P-value is calculated by the right-tailed Fisher Exact Test. (n = 4 young, 4 old biologically independent animals) ns, p $\geq$ 0.05; \*, p<0.05; \*\*, p<0.01; \*\*\*, p<0.001;

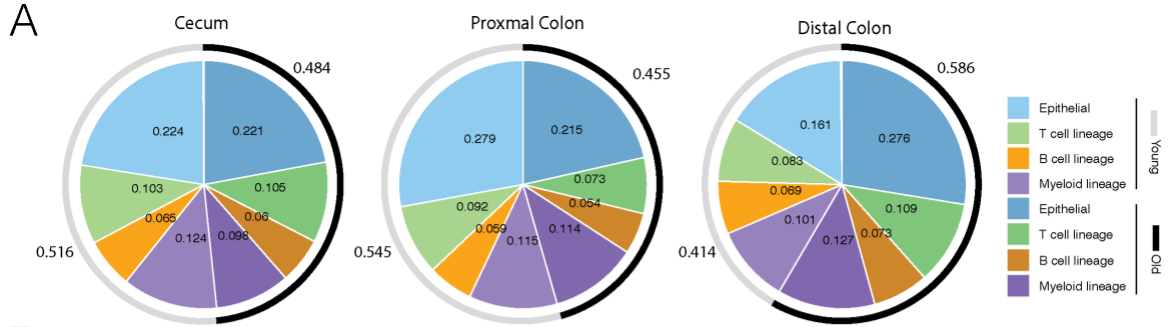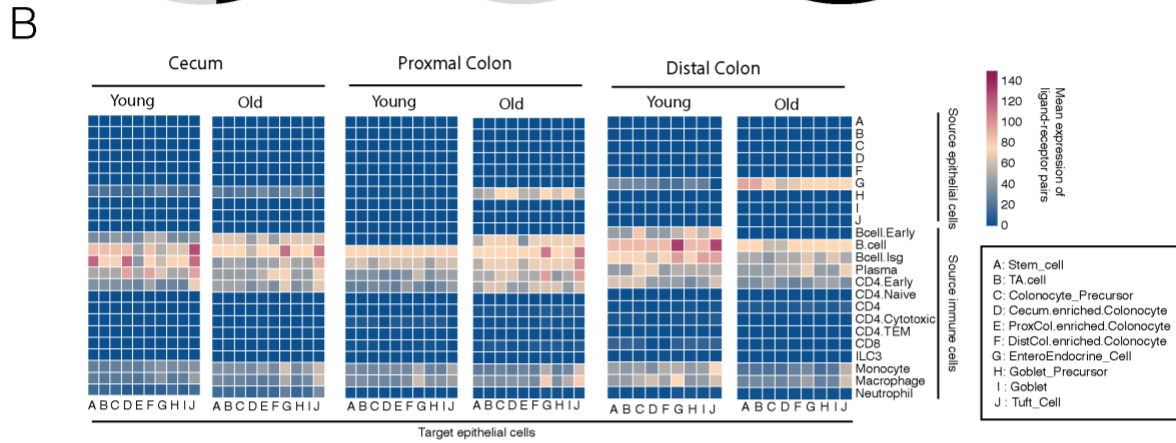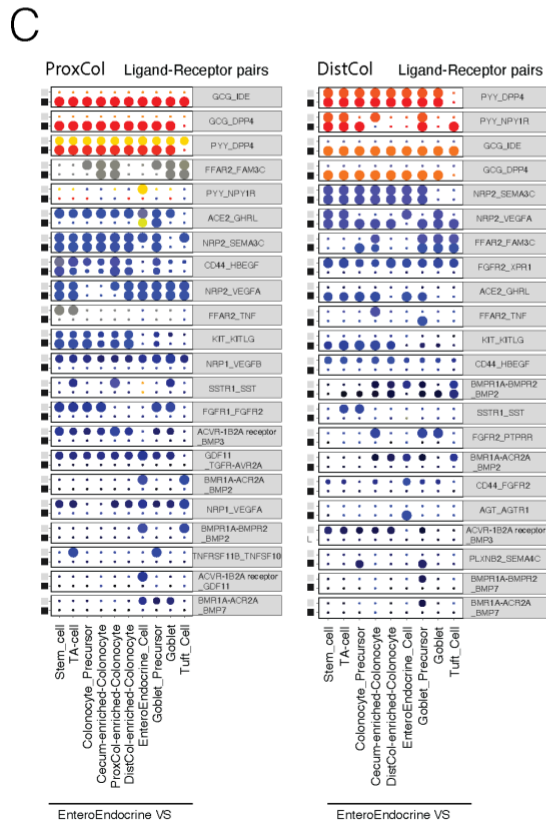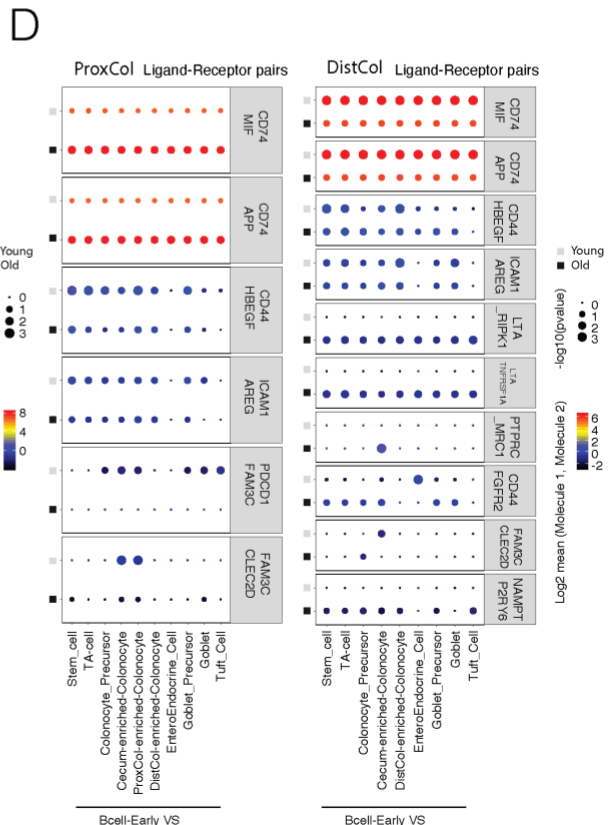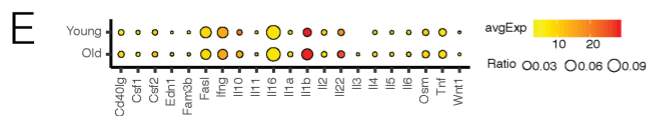

**Figure S5. Changes in cell-type interaction during aging, associated with interaction between immune and epithelial cells, related to Fig.7.**

**(A)** Pie charts indicating the percentage of interacting partners between epithelial/immune cells and epithelial cells in young and old groups from cecum (left), proximal colon (middle) and distal colon (right) (n = 4 young, 4 old biologically independent animals). **(B)** Heatmap of mean expression level of ligand-receptor pairs in the interaction between epithelial/immune cells and epithelial cells in cecum (left), proximal colon (middle) and distal colon (right). Row – source cell types, column - target cell types (n = 4 young, 4 old biologically independent animals). **(C, D)** Bubble plots of significantly ( $p < 0.05$ ) interacting partners between EE cells **(C)**, B-cell-Early **(D)** and epithelial cells in proximal colon (left) and distal colon (right) (n = 4 young, 4 old biologically independent animals; P-value (rank-sum test) refers to the enrichment of the interacting ligand-receptor pair in each of the interacting pairs of cell types. First gene: ligand, second gene: receptor). **(E)** Bubble plot of expression of cytokines in young and old immune cells, that are predicted to induce epithelial aging in cecum and colon (n = 4 young, 4 old biologically independent animals).
